# Supplementary material for: Screening for Patients with Visual Acuity Loss in Primary Health Care: A Cross Sectional Study in a Deprived Hungarian Population
Source: MDPI journal article supplement (doi:10.3390/healthcare11131941), 2023-07-05
Supplement: s1 [file s1]

**Table S1.** Demographic composition of the studied and the target population of the screening for visual acuity loss with the yield of screening across strata

| age groups | whole population |              | target group of the screening |              | positive screening results |             |
|------------|------------------|--------------|-------------------------------|--------------|----------------------------|-------------|
|            | males            | females      | males                         | females      | Males                      | Females     |
| 18-19      | 19 (1.44%)       | 44 (1.73%)   | 14 (1.82%)                    | 29 (2.23%)   | 0 (0%)                     | 0 (0%)      |
| 20-24      | 62 (4.71%)       | 107 (4.20%)  | 56 (7.29%)                    | 84 (6.45%)   | 0 (0%)                     | 0 (0%)      |
| 25-29      | 53 (4.02%)       | 117 (4.59%)  | 42 (5.47%)                    | 92 (7.07%)   | 1 (5.56%)                  | 1 (1.72%)   |
| 30-34      | 72 (5.47%)       | 130 (5.10%)  | 61 (7.94%)                    | 102 (7.83%)  | 1 (5.56%)                  | 2 (3.45%)   |
| 35-39      | 67 (5.09%)       | 173 (6.79%)  | 54 (7.03%)                    | 130 (9.98%)  | 0 (0%)                     | 4 (6.90%)   |
| 40-44      | 83 (6.30%)       | 211 (8.28%)  | 69 (8.98%)                    | 158 (12.14%) | 0 (0%)                     | 1 (1.72%)   |
| 45-49      | 112 (8.50%)      | 217 (8.52%)  | 77 (10.03%)                   | 137 (10.52%) | 1 (5.56%)                  | 2 (3.45%)   |
| 50-54      | 141 (10.71%)     | 242 (9.50%)  | 97 (12.63%)                   | 150 (11.52%) | 1 (5.56%)                  | 13 (22.41%) |
| 55-59      | 160 (12.15%)     | 281 (11.03%) | 84 (10.94%)                   | 126 (9.68%)  | 3 (16.67%)                 | 5 (8.62%)   |
| 60-64      | 158 (12.00%)     | 287 (11.26%) | 74 (9.64%)                    | 93 (7.14%)   | 5 (27.78%)                 | 5 (8.62%)   |
| 65-69      | 143 (10.86%)     | 247 (9.69%)  | 60 (7.81%)                    | 75 (5.76%)   | 1 (5.56%)                  | 5 (8.62%)   |
| 70-74      | 112 (8.50%)      | 235 (9.22%)  | 42 (5.47%)                    | 70 (5.38%)   | 1 (5.56%)                  | 11 (18.97%) |
| 75-79      | 72 (5.47%)       | 142 (5.57%)  | 23 (2.99%)                    | 36 (2.76%)   | 2 (11.11%)                 | 4 (6.90%)   |
| 80-84      | 43 (3.26%)       | 83 (3.26%)   | 10 (1.30%)                    | 16 (1.23%)   | 1 (5.56%)                  | 4 (6.90%)   |
| 85-89      | 13 (0.99%)       | 25 (0.98%)   | 4 (0.52%)                     | 4 (0.31%)    | 0 (0%)                     | 1 (1.72%)   |
| 90-94      | 7 (0.53%)        | 6 (0.24%)    | 1 (0.13%)                     | 0 (0%)       | 1 (5.56%)                  | 0 (0%)      |
| 95-99      | 0 (0%)           | 1 (0.04%)    | 0 (0%)                        | 0 (0%)       | 0 (0%)                     | 0 (0%)      |
| total      | 1317 (100%)      | 2548 (100%)  | 768 (100%)                    | 1302 (100%)  | 18 (100%)                  | 58 (100%)   |

**Table S2** Characteristics of the study population not above 65 years of age

|                                     |                                     | N (%)              |
|-------------------------------------|-------------------------------------|--------------------|
| Sex                                 | Male                                | 628 (36.3%)        |
|                                     | Female                              | 1101 (63.7%)       |
| Age                                 | mean ( $\pm$ SD)                    | 43.1 ( $\pm$ 12.6) |
| Education                           | non-completed primary school        | 188 (10.9%)        |
|                                     | completed primary school            | 492 (28.5%)        |
|                                     | secondary school without graduation | 454 (26.3%)        |
|                                     | secondary school with graduation    | 463 (26.8%)        |
|                                     | higher education                    | 132 (7.6%)         |
| Employment                          | Unemployed                          | 743 (43%)          |
|                                     | Employed                            | 986 (57%)          |
| Ethnicity                           | non-Roma                            | 1491 (86.2%)       |
|                                     | Roma                                | 238 (13.8%)        |
| Hypertension                        | Normotensive                        | 851 (49.2%)        |
|                                     | untreated hypertension              | 232 (13.4%)        |
|                                     | insufficiently treated hypertension | 343 (19.8%)        |
|                                     | properly treated hypertension       | 303 (17.5%)        |
| Diabetes                            | Normoglycemic                       | 1540 (89.1%)       |
|                                     | untreated diabetes                  | 51 (2.9%)          |
|                                     | insufficiently treated diabetes     | 87 (5%)            |
|                                     | properly treated diabetes           | 51 (2.9%)          |
| Visual acuity                       | visual acuity $\geq 0.5$            | 1684 (97.4%)       |
|                                     | visual acuity $< 0.5$               | 45 (2.6%)          |
| <b>Total number of participants</b> |                                     | <b>1729</b>        |

**Table S3.** Association between socio-demographic and clinical characteristics with the visual impairment among adults not above 65 by multivariate linear and logistic regression models

| Influencing factors |                                     | adjusted linear regression coefficients* | adjusted odds ratios*     |
|---------------------|-------------------------------------|------------------------------------------|---------------------------|
| Sex                 | male                                | 0 (reference)                            | 1 (reference)             |
|                     | female                              | 0.72 (-0.16 ; 1.59)                      | 1.37 (0.66 ; 2.81)        |
| Age                 | year                                | <b>0.12 (0.08 ; 0.16)</b>                | <b>1.08 (1.04 ; 1.12)</b> |
| Education           | non-completed primary school        | 0 (reference)                            | 1 (reference)             |
|                     | completed primary school            | 0.64 (-0.81 ; 2.08)                      | 1.36 (0.57 ; 3.24)        |
|                     | secondary school without graduation | -1.37 (-2.88 ; 0.14)                     | 0.75 (0.26 ; 2.18)        |
|                     | secondary school with graduation    | <b>-1.72 (-3.23 ; -0.22)</b>             | 0.32 (0.09 ; 1.14)        |
|                     | higher education                    | -1.61 (-3.58 ; 0.36)                     | 1.02 (0.24 ; 4.34)        |
| Employment          | unemployed                          | 0 (reference)                            | 1 (reference)             |
|                     | employed                            | <b>-1.15 (-1.99 ; -0.31)</b>             | 0.52 (0.26 ; 1.02)        |
| Ethnicity           | non-Roma                            | 0 (reference)                            | 1 (reference)             |
|                     | Roma                                | <b>2.14 (0.91 ; 3.36)</b>                | <b>2.3 (1.08 ; 4.93)</b>  |
| Hypertension        | normotensive                        | 0 (reference)                            | 1 (reference)             |
|                     | untreated hypertension              | 0.38 (-0.92 ; 1.69)                      | 0.51 (0.18 ; 1.47)        |
|                     | insufficiently treated hypertension | 0.31 (-0.91 ; 1.54)                      | 0.58 (0.25 ; 1.34)        |
|                     | properly treated hypertension       | -0.59 (-1.8 ; 0.62)                      | 0.47 (0.19 ; 1.17)        |
| Diabetes mellitus   | normoglycemic                       | 0 (reference)                            | 1 (reference)             |
|                     | untreated diabetes                  | -2.29 (-4.71 ; 0.12)                     | 0.41 (0.05 ; 3.11)        |
|                     | insufficiently treated diabetes     | -0.03 (-1.94 ; 1.88)                     | 1.09 (0.35 ; 3.4)         |
|                     | properly treated diabetes           | <b>-3.03 (-5.46 ; -0.6)</b>              | nc                        |

\* with corresponding [95%CI]

nc: not computable
